# Supplementary material
Source: publisher figshare collection journal article supplement (https://acs.figshare.com/ndownloader/files/7727173)
Supplement: Supplementary file 1 [file 7727173]

## Supporting Information

### Amplified Peroxidase-Like Activity in Iron Oxide Nanoparticles using Adenosine Monophosphate: Application to Urinary Protein Sensing

Ya-Chun Yang<sup>1</sup>, Yen-Ting Wang<sup>1</sup>, and Wei-Lung Tseng<sup>\*1,2,3</sup>

<sup>1</sup>. Department of Chemistry, National Sun Yat-sen University, Taiwan

<sup>2</sup>. School of Pharmacy, College of Pharmacy, Kaohsiung Medical University, Taiwan

<sup>3</sup>. Center for Nanoscience and Nanotechnology, National Sun Yat-sen University,  
Taiwan

Correspondence: Dr. Wei-Lung Tseng, Department of Chemistry, National Sun Yat-sen University, 70, Lien-hai Road, Kaohsiung, Taiwan 804.

E-mail: tsengwl@mail.nsysu.edu.tw

Fax: 011-886-7-3684046.

#### Abstract

In the section of supporting information, we include detail information associated with DLS spectra of the Fe<sub>3</sub>O<sub>4</sub> NPs and the AMP-Fe<sub>3</sub>O<sub>4</sub> NPs, the fluorescence of the oxidized AU obtained from the different catalytic conditions, the effect of storage time of the AMP-induced enhancement of the Fe<sub>3</sub>O<sub>4</sub> NP activity, determination of the net charge of AU by capillary electrophoresis, the use of reversed-phase high performance liquid chromatography for the detection of AMP hydrolysis under different catalytic conditions, and BET analyses of the Fe<sub>3</sub>O<sub>4</sub> NPs and the AMP-Fe<sub>3</sub>O<sub>4</sub> NPs.

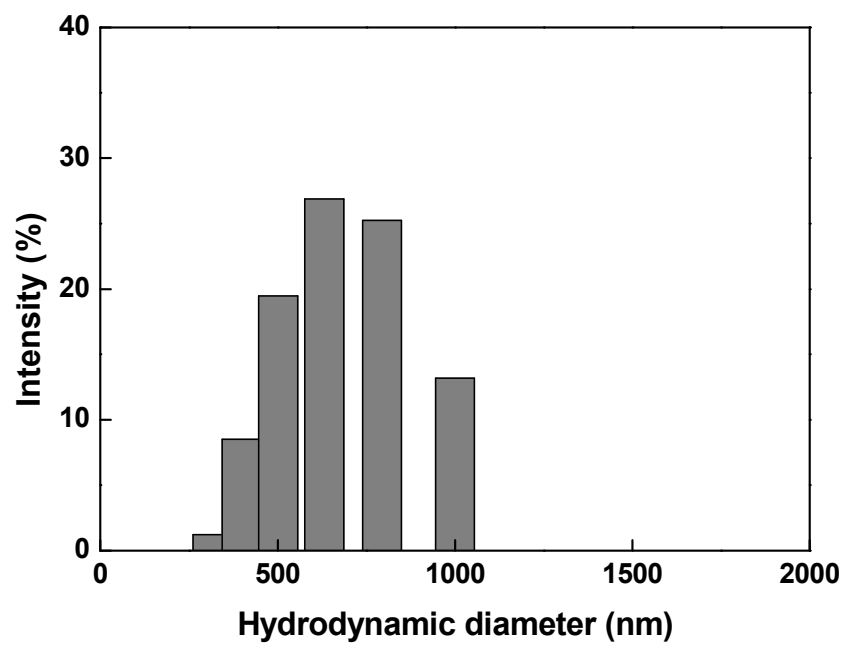

**Figure S1.** DLS spectrum of the as-prepared Fe<sub>3</sub>O<sub>4</sub> NPs.

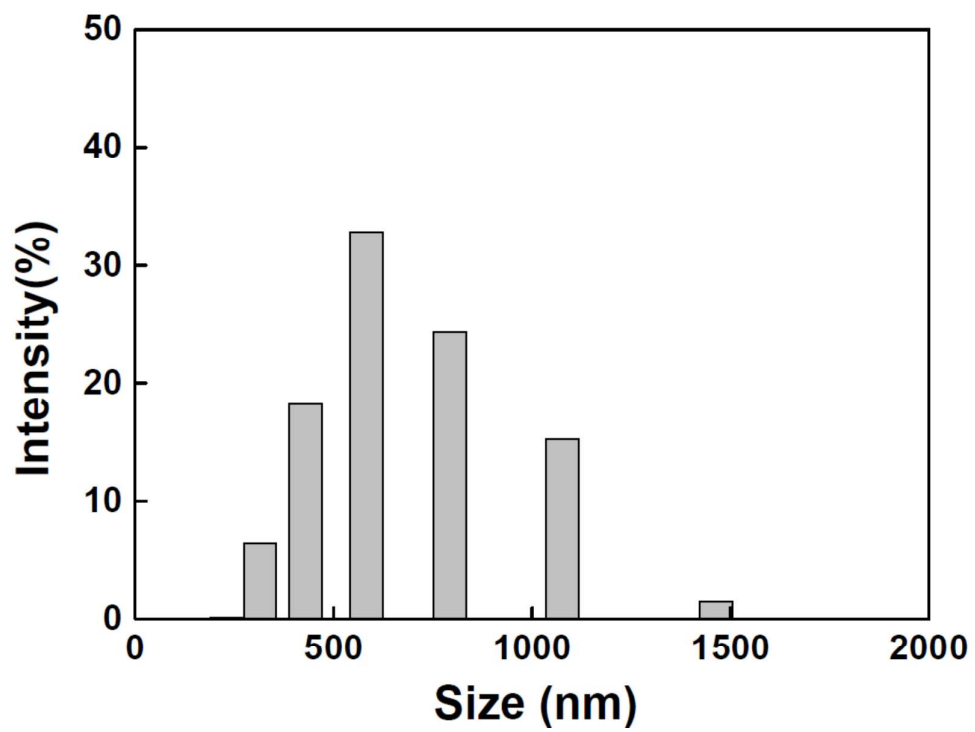

**Figure S2.** DLS spectrum of the AMP-Fe<sub>3</sub>O<sub>4</sub> NPs.

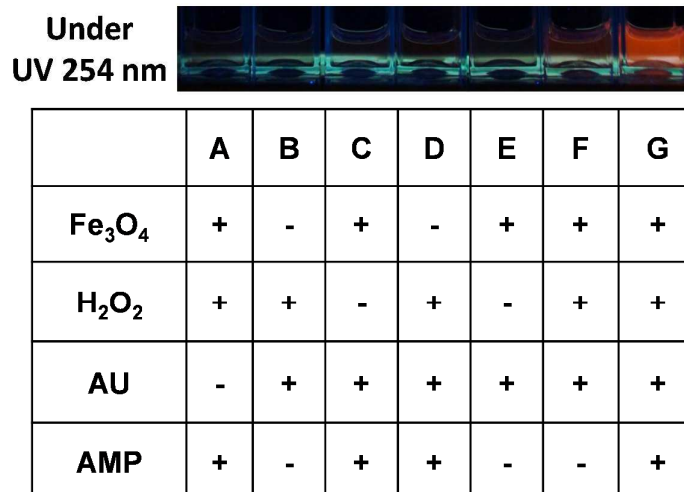

**Figure S3.** Visual analyses demonstrate that the production of the oxidized AU only occurred in the presence of (F) Fe<sub>3</sub>O<sub>4</sub> NPs, H<sub>2</sub>O<sub>2</sub>, AU and (G) Fe<sub>3</sub>O<sub>4</sub> NPs, H<sub>2</sub>O<sub>2</sub>, AU AMP. The Fe<sub>3</sub>O<sub>4</sub> NPs were incubated with adenosine analogs for 1 min in 10 mM Tris-HCl (pH 7.0). The concentrations of NPs, AMP, AU, and H<sub>2</sub>O<sub>2</sub> are 1 mg/ml, 0,1 mM, 5 µM, and 2.5 mM, respectively.

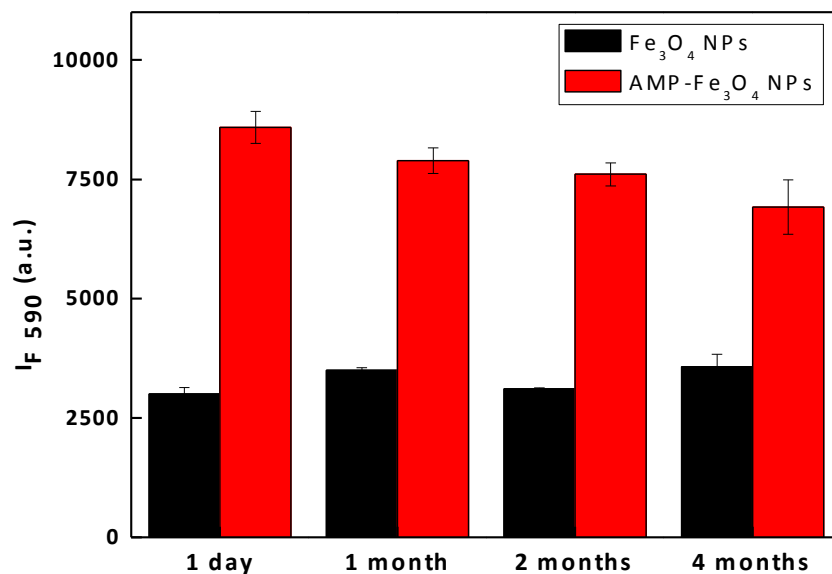

**Figure S4.** Effect of storage time on the catalytic activity of the Fe<sub>3</sub>O<sub>4</sub> NPs in the absence (black bar) and presence (red bar) of 0.1 mM AMP. At each storage time, the catalytic activity of the Fe<sub>3</sub>O<sub>4</sub> NPs was measured by incubating 1 mg/mL Fe<sub>3</sub>O<sub>4</sub> NPs with 2.5 mM H<sub>2</sub>O<sub>2</sub> and 5 μM AU in 10 mM Tris-HCl (pH 7.0) at 37 °C for 25 min. Additionally, the AMP-induced improvement of the catalytic activity of the Fe<sub>3</sub>O<sub>4</sub> NPs was examined by mixing 1 mg/mL Fe<sub>3</sub>O<sub>4</sub> NPs with 0.1 mM AMP, following by the above mentioned procedure.

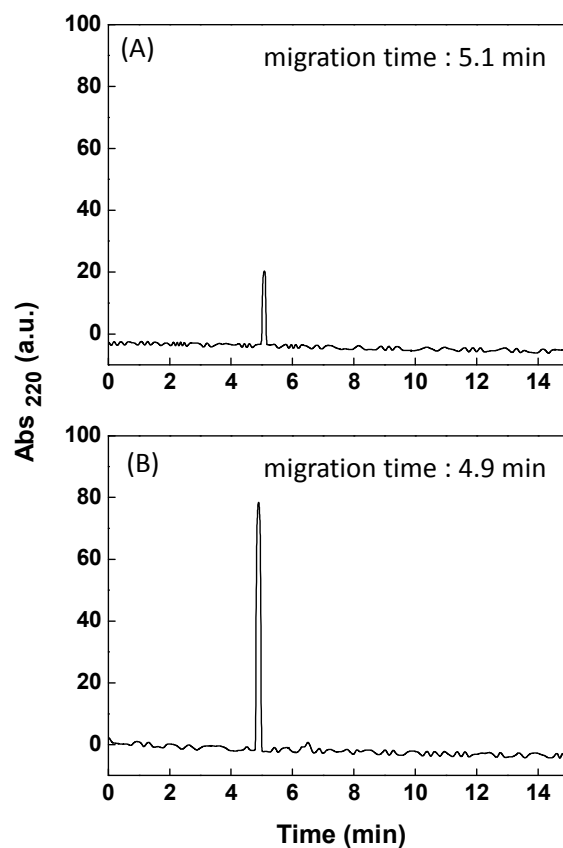

**Figure S5.** Detection of (A) benzyl alcohol and (B) AU by capillary electrophoresis. Electrophoretic conditions: 60-cm capillary (10-cm to detector); separation buffer, 10 mM Tris-HCl at pH 7.0; applied voltage, 15 kV; hydrodynamic injection at 20-cm height for 10 s; and direct UV detection at 220 nm.

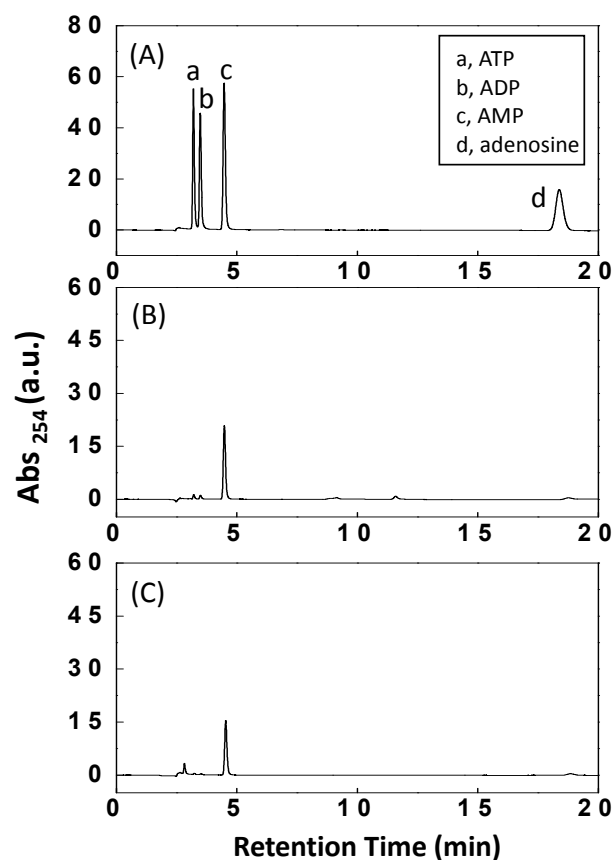

**Figure S6.** (A) Separation of a mixture of ATP, ADP, AMP, and adenosine by reversed-phase HPLC. (B) Detection of the supernatant 1 by reversed-phase HPLC. A mixture of the  $\text{Fe}_3\text{O}_4$  NPs and AMP was treated with an external magnetic field. After collecting the  $\text{Fe}_3\text{O}_4$  NPs, the supernatant 1 was detected by reversed-phase HPLC. (C) Detection of the supernatant 2 by reversed-phase HPLC. A mixture of the  $\text{Fe}_3\text{O}_4$  NPs, AMP, AU, and  $\text{H}_2\text{O}_2$  was treated with an external magnetic field. After collecting the  $\text{Fe}_3\text{O}_4$  NPs, the supernatant 2 was detected by reversed-phase HPLC. The flow rate of the mobile phase is 1 mL/min. The composition of the mobile phase includes 90% of 0.1 M phosphate buffer (pH 6.0) and 10% of methanol. The concentration of each adenosine analog is 100  $\mu\text{M}$ .

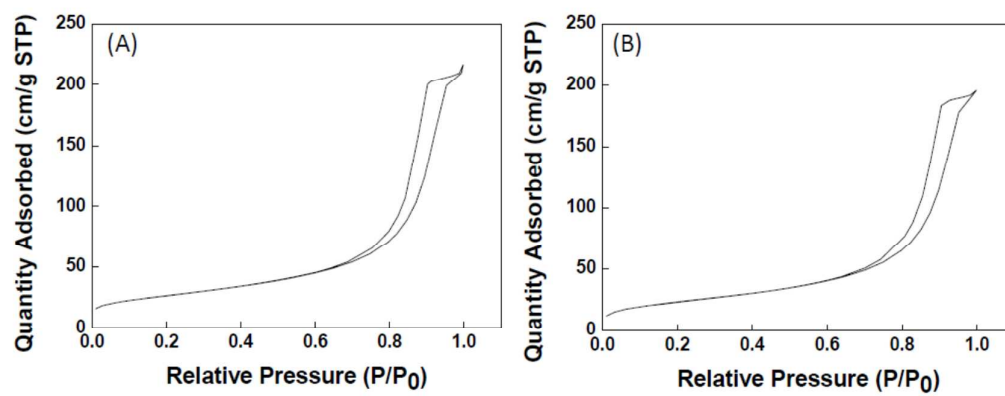

**Figure S7.** BET analyses of (A) the Fe<sub>3</sub>O<sub>4</sub> NPs and (B) the AMP-Fe<sub>3</sub>O<sub>4</sub> NPs.
